# Supplementary material
Source: PubMed Central journal article supplement (PMC2918951)

Supplemental Figure S1: Comparison of the growth of the wild type and of mutants of *R. eutropha* H16. Cells were incubated on MSM agar plates containing sodium gluconate (1.5%, wt/vol) and 0.05% ammonium chloride for 3 days at 30°C.

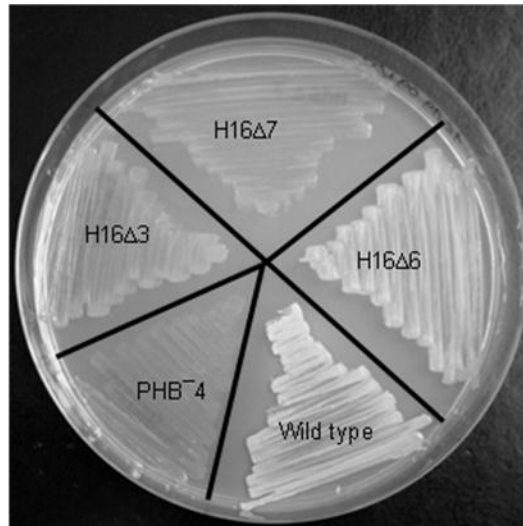

Supplement: supp_76_16_5373__1.pdf [file supp_76_16_5373__1.pdf]
