# Supplementary material
Source: PubMed Central journal article supplement (PMC2918951)
Supplement: supp_76_16_5373__2.pdf [file supp_76_16_5373__2.pdf]

Supplemental Table S1: Oligonucleotides used in this study

Restriction sites are underlined

| Oligonucleotides                             | Sequence                                      | Location                                                    |
|----------------------------------------------|-----------------------------------------------|-------------------------------------------------------------|
| <i>phaA_XbaI_fw</i> (flanking region 1)      | aaat <u>ctagac</u> acactacctgcagaacgagctc     | 5' end of flanking region 1 (upstream of <i>phaA</i> )      |
| <i>phaA_EcoRI_rv</i> (flanking region 1)     | aaagaattc <u>cg</u> gatacagatgacaacgtcagtc    | 3' end of flanking region 1 (upstream of <i>phaA</i> )      |
| <i>phaA_EcoRI_fw</i> (flanking region 2)     | aaagaattc <u>cg</u> agtcgagcgcaataaggaa       | 5' end of flanking region 2 (downstream of <i>phaA</i> )    |
| <i>phaA_SacI_rv</i> (flanking region 2)      | aaagagct <u>ccc</u> gacgagatgttgacgatgc       | 3' end of flanking region 2 (downstream of <i>phaA</i> )    |
| <i>phaA_fw</i> (control)                     | aaactgctgttctggaacggcgag                      | 5' end of region upstream of <i>phaA</i>                    |
| <i>phaA_rv</i> (control)                     | aaatggcgggtggagtagttggtctg                    | 5' end of region downstream of <i>phaA</i>                  |
| <i>bktB_XbaI_fw</i> (flanking region 1)      | aaat <u>ctagact</u> gagctgacctccgcagc         | 5' end of flanking region 1 (upstream of <i>bktB</i> )      |
| <i>bktB_EcoRI_rv</i> (flanking region 1)     | aaagaattc <u>ccac</u> gcgtcatgactttgtctcc     | 3' end of flanking region 1 (upstream of <i>bktB</i> )      |
| <i>bktB_EcoRI_fw</i> (flanking region 2)     | aaagaattc <u>cg</u> cgctggtgacgatgtgcatc      | 5' end of flanking region 2 (downstream of <i>bktB</i> )    |
| <i>bktB_SacI_rv</i> (flanking region 2)      | aaagagct <u>cag</u> cacgatggccgggttg          | 3' end of flanking region 2 (downstream of <i>bktB</i> )    |
| <i>bktB_fw</i> (control)                     | aatgccgagaagaccatggac                         | 5' end of region upstream of <i>bktB</i>                    |
| <i>bktB_rv</i> (control)                     | tgttgggcctcatgtcgaac                          | 3' end of region downstream of <i>bktB</i>                  |
| H16_A1713/B1771_XbaI_fw (flanking region 1)  | gacat <u>ctagagc</u> gtattgatcctgcgc          | 5' end of flanking region 1 (upstream of H16_A1713/B1771)   |
| H16_A1713/B1771_BamHI_rv (flanking region 1) | aaggat <u>ccaat</u> cagttcaatcggccgc          | 3' end of flanking region 1 (upstream of H16_A1713/B1771)   |
| H16_A1713/B1771_BamHI_fw (flanking region 2) | aaaggat <u>ccc</u> gttctcgtagcgggcatgc        | 5' end of flanking region 2 (downstream of H16_A1713/B1771) |
| H16_A1713/B1771_XbaI_rv (flanking region 2)  | ttt <u>ctagaaa</u> acctgcactggctcgtcgg        | 3' end of flanking region 2 (downstream of H16_A1713/B1771) |
| H16_A1713/B1771_fw (control)                 | gacatctagagcgtattgatcctgcgc                   | 5' end of region upstream of H16_A1713/B1771                |
| H16_A1713/B1771_rv (control)                 | catctttaccggcgcatggaagtc                      | 3' end of region downstream of H16_A1713/B1771              |
| H16_B1369_XbaI_fw (flanking region 1)        | aagctgaccaacgcacgcaagagcat <u>ctagac</u>      | 5' end of flanking region 1 (upstream of H16_B1369)         |
| H16_B1369_EcoRI_rv (flanking region 1)       | tttgaattc <u>cg</u> gaagtctccttggaaactctgtgtg | 3' end of flanking region 1 (upstream of H16_B1369)         |
| H16_B1369_EcoRI_fw (flanking region 2)       | aaagaattc <u>ct</u> gagcctgcttttgcctttg       | 5' end of flanking region 2 (downstream of H16_B1369)       |

|                                           |                                        |                                                       |
|-------------------------------------------|----------------------------------------|-------------------------------------------------------|
| H16_B1369_XbaI_rv<br>(flanking region 2)  | <u>aaatctagacttgaacggctccttgacgttg</u> | 3' end of flanking region 2 (downstream of H16_B1369) |
| H16_B1369_fw (control)                    | tgcagatgggcatcggaac                    | 5' end of region upstream of H16_B1369                |
| H16_B1369_rv (control)                    | tcgaacatcacgtcgatctggc                 | 3' end of region downstream of H16_B1369              |
| H16_A0170_XbaI_fw<br>(flanking region 1)  | <u>aaatctagatgcgctggccaaccagc</u>      | 5' end of flanking region 1 (upstream of H16_A0170)   |
| H16_A0170_BamHI_rv<br>(flanking region 1) | <u>ggatccgatgaagaagcgggtgtgtgcg</u>    | 3' end of flanking region 1 (upstream of H16_A0170)   |
| H16_A0170_Bam_fw<br>(flanking region 2)   | <u>ggatccagcaagacagaggcagttgtctg</u>   | 5' end of flanking region 2 (downstream of H16_A0170) |
| H16_A0170_XbaI_rv<br>(flanking region 2)  | <u>tctagcgtctgctgcacggtcaggtc</u>      | 3' end of flanking region 2 (downstream of H16_A0170) |
| H16_A0170_fw (control)                    | tgcctatcacagttcagagcgattcattcac        | 5' end of region upstream of H16_A0170                |
| H16_A0170_rv (control)                    | atcagcgccagcgacaggtagctccag            | 3' end of region downstream of H16_A0170              |
| H16_B0381_XbaI_fw<br>(flanking region 1)  | ccgtacgtcaacgat <u>ctagagcagttcg</u>   | 5' end of flanking region 1 (upstream of H16_B0381)   |
| H16_B0381_EcoRI_rv<br>(flanking region 1) | ggcctcgaactgtgctgaga <u>attcttt</u>    | 3' end of flanking region 1 (upstream of H16_B0381)   |
| H16_B0381_EcoRI_fw<br>(flanking region 2) | <u>agaattcggccatgagcgttctgc</u>        | 5' end of flanking region 2 (downstream of H16_B0381) |
| H16_B0381_XbaI_rv<br>(flanking region 2)  | tggttgcgat <u>ctagagcagttcctg</u>      | 3' end of flanking region 2 (downstream of H16_B0381) |
| H16_B0381_fw (control)                    | aatgacgacgccgacctcctcg                 | 5' end of region upstream of H16_B0381                |
| H16_B0381_rv (control)                    | tgtcggttcagcagccctgaagac               | 3' end of region downstream of H16_B0381              |
| H16_A1528_XbaI_fw<br>(flanking region 1)  | aagtgggtgccct <u>ctagaaccggc</u>       | 5' end of flanking region 1 (upstream of H16_A1528)   |
| H16_A1528_BamHI_rv<br>(flanking region 1) | gtgggatccagttcgggtgctcg                | 3' end of flanking region 1 (upstream of H16_A1528)   |
| H16_A1528_BamHI_fw<br>(flanking region 2) | cgaagggatccgatgtcggtcg                 | 5' end of flanking region 2 (downstream of H16_A1528) |
| H16_A1528_XbaI_rv<br>(flanking region 2)  | <u>cttaga</u> aatgcccgtcttctggtcg      | 3' end of flanking region 2 (downstream of H16_A1528) |
| H16_A1528_fw (control)                    | ttcaacggttaataccgccacatgg              | 5' end of region upstream of H16_A1528                |
| H16_A1528_rv (control)                    | agctggtgccgacgttggcac                  | 3' end of region downstream of H16_A1528              |
| RT-PCR_ptsH_fw                            | atgctgcagagggacaccac                   | 5' end of region upstream of <i>ptsH</i>              |
| RT-PCR_ptsH_rv                            | tcactctccctcaccaaacggg                 | 3' end of region downstream of <i>ptsH</i>            |
